# Supplementary material
Source: PubMed Central journal article supplement (PMC6318055)
Supplement: NIHMS1511906-supplement-1.pdf [file NIHMS1511906-supplement-1.pdf]

Supplementary Figure 1

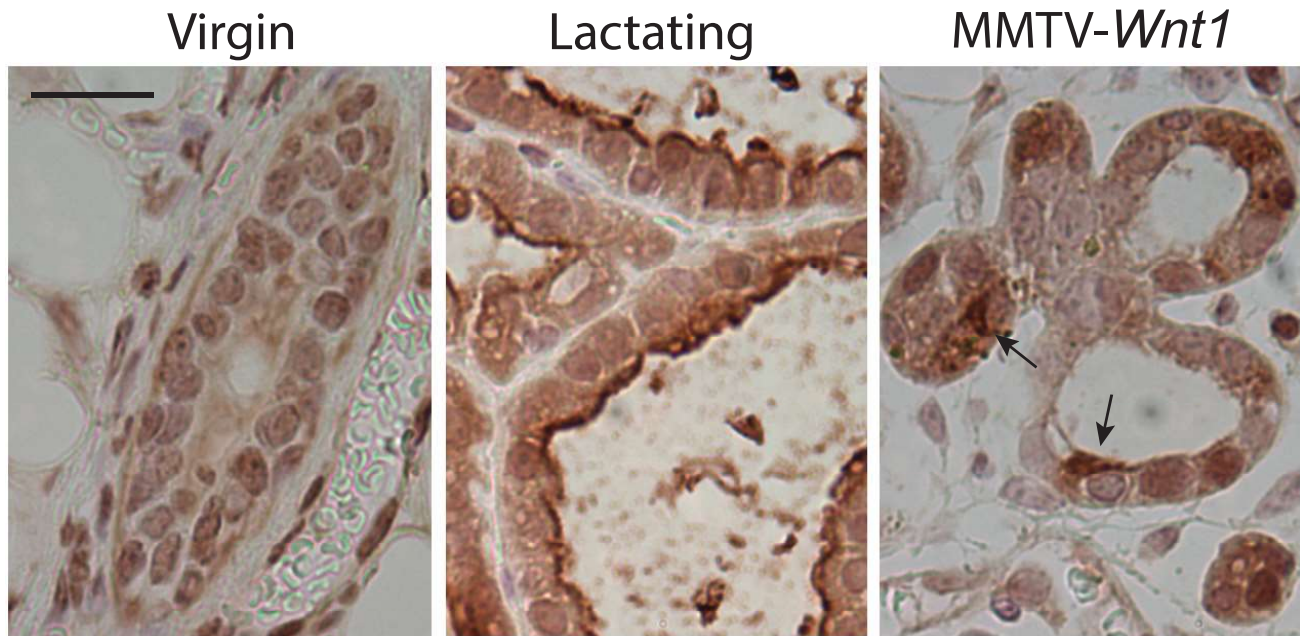

**Supplementary Figure 1. MMTV-*Wnt1* precancerous glands contain WAP+ cells.** WAP+ cells can be detected in the precancerous glands of MMTV-*Wnt1* mice by IHC. Virgin (left) and lactating day 5 (middle) wild type mammary glands were used as controls. Arrows show WAP+ cells. Age = 3~4 months. Scale bar = 20 $\mu$ m.
