# Supplementary material
Source: PubMed Central journal article supplement (PMC6318055)
Supplement: NIHMS1511906-supplement-2.pdf [file NIHMS1511906-supplement-2.pdf]

Supplementary Figure 2

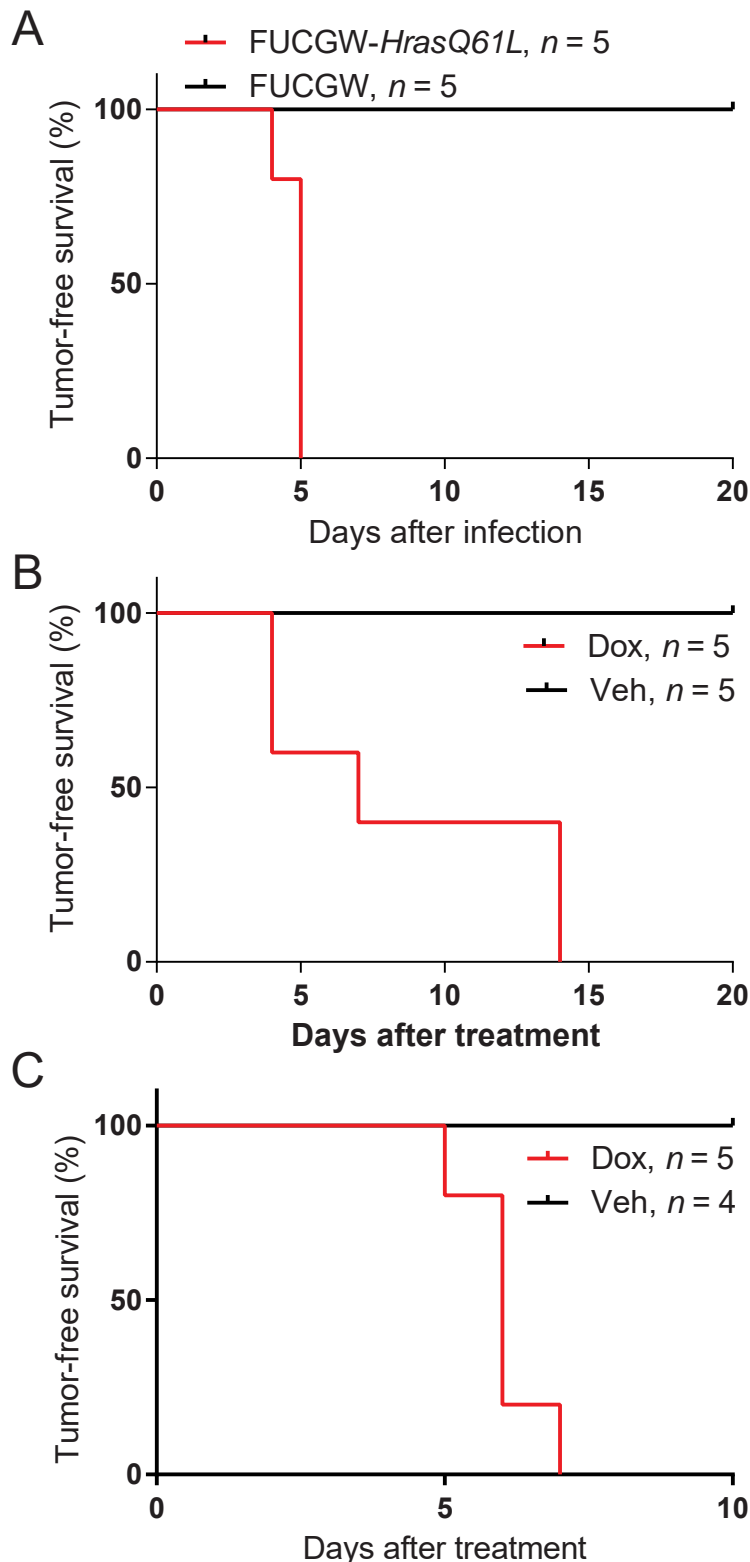

**Supplementary Figure 2. Mutated *Ras* is sufficient to transform precancerous cells in the MMTV-*Wnt1* mammary glands into cancer.** (A) Tumor-free Kaplan-Meier plot of mice infected by FUCGW-*HrasQ61L*. Empty FUCGW virus was used as a negative control. Age = 9 to 10 weeks. Virus dosage:  $3 \times 10^5$  IUs/gland. (B) Tumor-free Kaplan-Meier plot of mice infected by doxycycline-inducible piG-*KrasG12D*. Age = 8 to 10 weeks. Virus dosage:  $2.5 \times 10^4$  IUs/gland. (C) Tumor-free Kaplan-Meier plot of mice infected by doxycycline-inducible piG-*NrasG12V*. Age = 9 to 11 weeks. Virus dosage:  $7.2 \times 10^4$  IUs/gland. Dox: doxycycline-treated, Veh: vehicle-treated.
