# Supplementary material
Source: PubMed Central journal article supplement (PMC6318055)
Supplement: NIHMS1511906-supplement-4.pdf [file NIHMS1511906-supplement-4.pdf]

Supplementary Figure 4

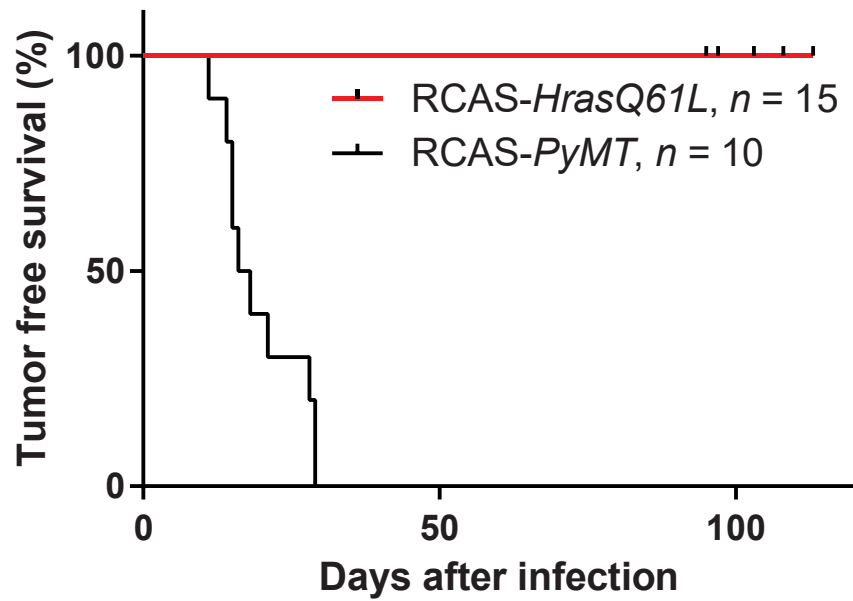

**Supplementary Figure 4. *HrasQ61L* is not sufficient to induce tumors from KRT6a+ cells in normal mammary glands.** Tumor-free Kaplan-Meier plot of K6a-*tva* mice infected by RCAS-*HrasQ61L*. RCAS-*PyMT* was used as positive control. Mouse age: 8~10 weeks. Virus dosages for both RCAS-*HrasQ61L* and RCAS-*PyMT* were  $1 \times 10^7$  IUs/gland.
