# Supplementary material
Source: PubMed Central journal article supplement (PMC6318055)
Supplement: NIHMS1511906-supplement-6.pdf [file NIHMS1511906-supplement-6.pdf]

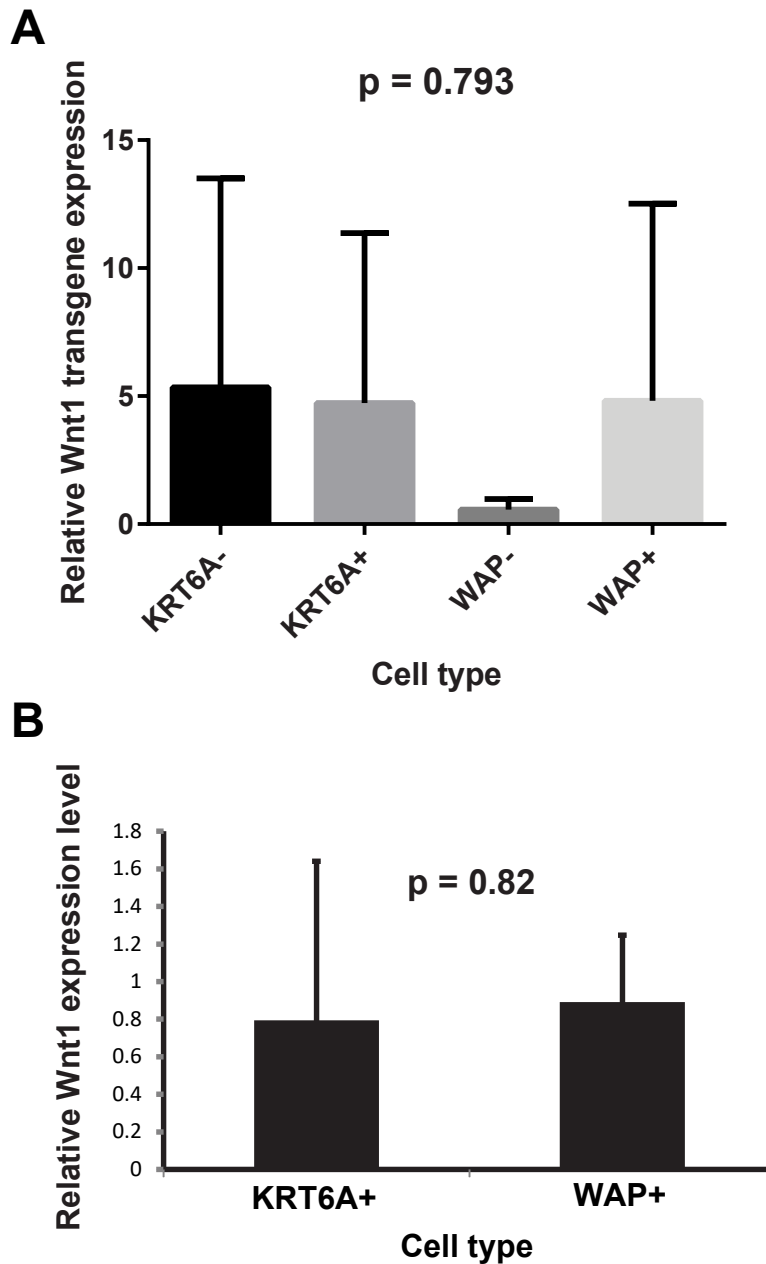

**Supplementary Figure 6. *Wnt1* gene expression in KRT6A+ and WAP+ cells in MMTV-*Wnt1* precancerous mammary glands. (A)** The MMTV-*Wnt1* transgene is expressed in both KRT6A+ and WAP+ cells. The expression of MMTV-*Wnt1* transgene in TVA+ and TVA- (also Lin-) cells from K6a-*tva*/MMTV-*Wnt1* and WAP-*tva*/MMTV-*Wnt1* mouse precancerous mammary glands (n = 3, age = 8~9 weeks) was quantified by RT-qPCR using a transgene specific assay, respectively. One way ANOVA was used for statistical analysis. **(B)** The endogenous *Wnt1* gene expression of TVA+ cells from K6a-*tva*/MMTV-*Wnt1* and WAP-*tva*/MMTV-*Wnt1* mouse precancerous mammary glands (n = 3 and 4, age = 8~9 weeks) was quantified by RT-qPCR using an assay containing a probe spanning exons, respectively.
