# Supplementary material
Source: PubMed Central journal article supplement (PMC6318055)
Supplement: NIHMS1511906-supplement-7.pdf [file NIHMS1511906-supplement-7.pdf]

Supplementary Figure 7

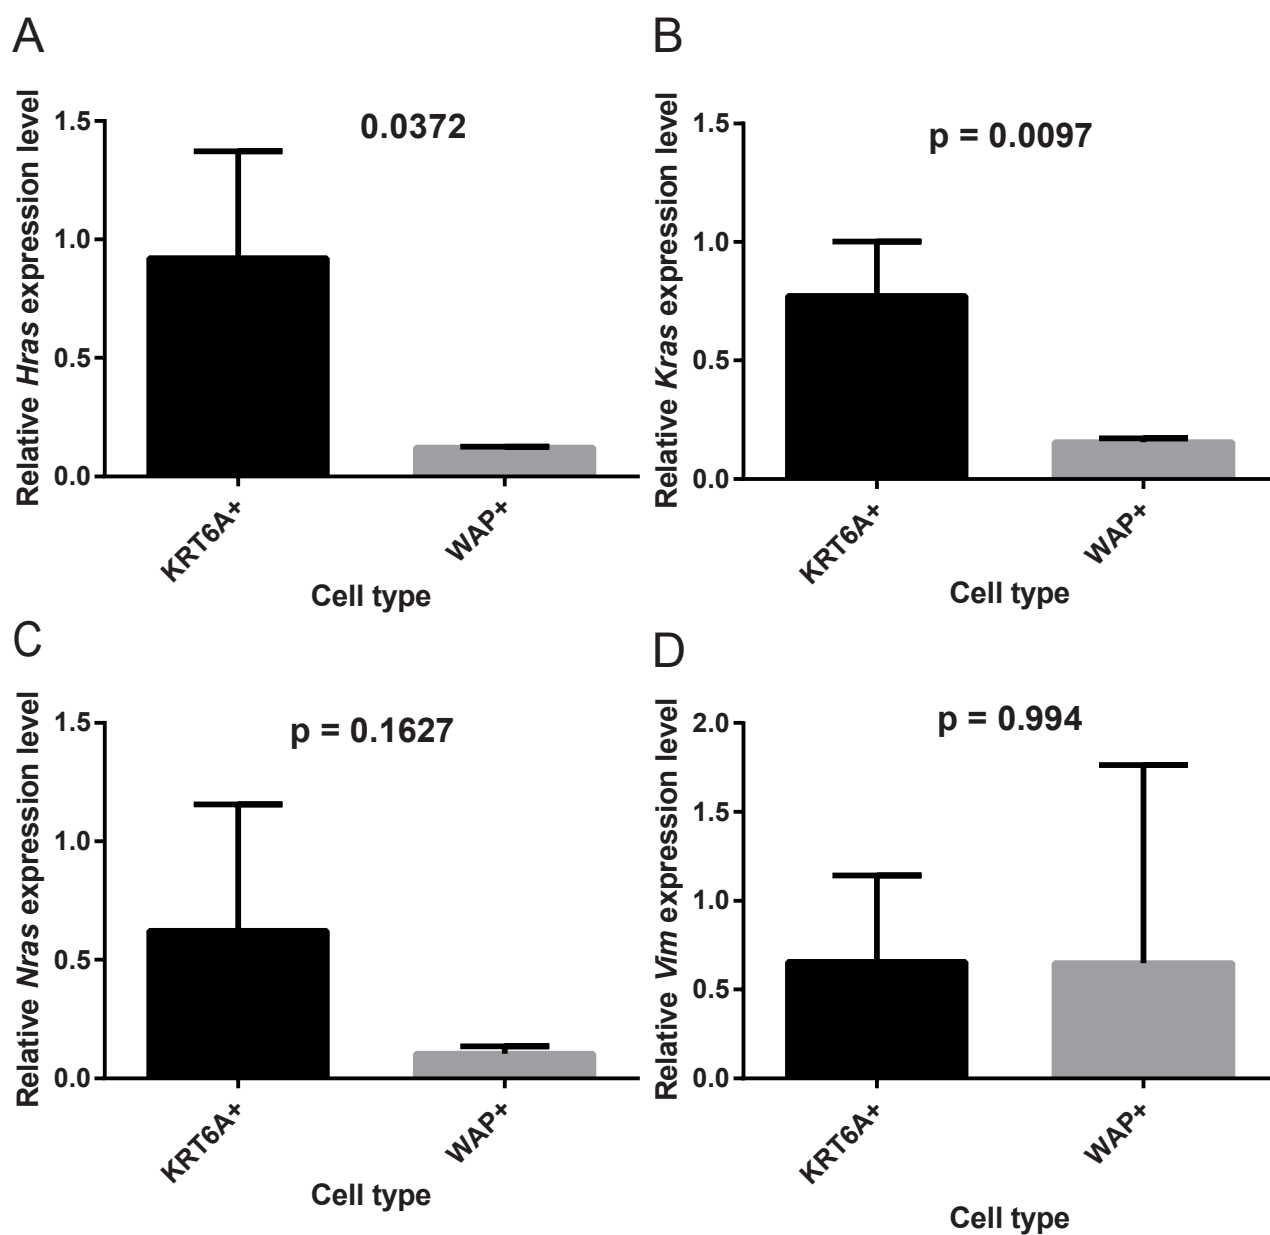

**Supplementary Figure 7. The gene expression of RAS family and Vimentin.** The expression of *Hras* (A), *Kras* (B), *Nras* (C) and *Vim* (D) in TVA+ cells from K6a-*tva*/MMTV-*Wnt1* and WAP-*tva*/MMTV-*Wnt1* mouse precancerous mammary glands (n = 3, age = 8~9 weeks) were quantified by RT-qPCR, respectively.
